# Supplementary material for: Isolated theta waves originating from the midline thalamus trigger memory reactivation during NREM sleep in mice
Source: PubMed Central journal article supplement — Nat Commun. 2024 Oct 25;15:9231. doi: 10.1038/s41467-024-53522-9 (PMC11511994; doi:10.1038/s41467-024-53522-9), 2024-10-25
Supplement: 41467_2024_53522_MOESM1_ESM.pdf [file 41467_2024_53522_MOESM1_ESM.pdf]

1 **Isolated theta waves originating from the midline thalamus trigger**  
2 **memory reactivation during NREM sleep in mice**

3

4 Qin Xiao, Minmin Lu, Xiaolong Zhang, Jiangheng Guan, Xin Li, Ruyi Wen, Na  
5 Wang, Ling Qian, Yixiang Liao, Zehui Zhang, Xiang Liao, Chenggang Jiang, Faguo

6 Yue, Shuancheng Ren, Jianxia Xia, Jun Hu, Fenlan Luo, Zhian Hu, Chao He

7

8 **Supplementary Information**

9 **Supplementary information contains 14 supplementary figures**

10

11

12

13

14

15

16

17

18

19

20

21

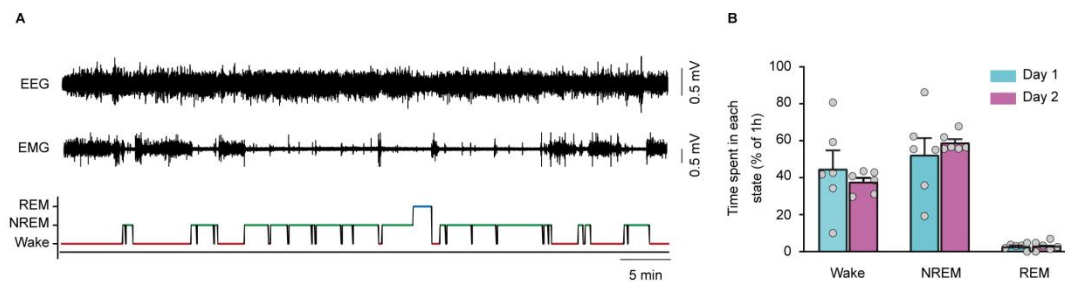

22

23 **Supplementary Figure 1. Sleep-wakefulness architecture during post-training**  
 24 **phase.**

25 **A** Representative raw EEG-EMG traces, and corresponding color-coded hypnogram  
 26 during post-training phase.

27 **B** Comparison of the time spent in each state during post-training phase on the first  
 28 day and the second day. White circles represent individual mouse (Two tailed  
 29 unpaired  $t$  test,  $n = 6$  mice for each group, day 1-wake vs. day 2-wake,  $t_{10} = 0.700$ ,  $P =$   
 30  $0.500$ ; day 1-NREM vs. day 2-NREM,  $t_{10} = -0.695$ ,  $P = 0.503$ ; day 1-REM vs. day 2-  
 31 REM,  $t_{10} = -0.303$ ,  $P = 0.768$ ).

32  $n = 6$  mice were shared in the experiment of recording spikes and LFP in the MEC as  
 33 well as EEG-EMG recording in the Fig. 1 and Supplementary Figure. 1-3.

34 Data are presented as mean  $\pm$  s.e.m. Source data are provided as a Source Data file.

35

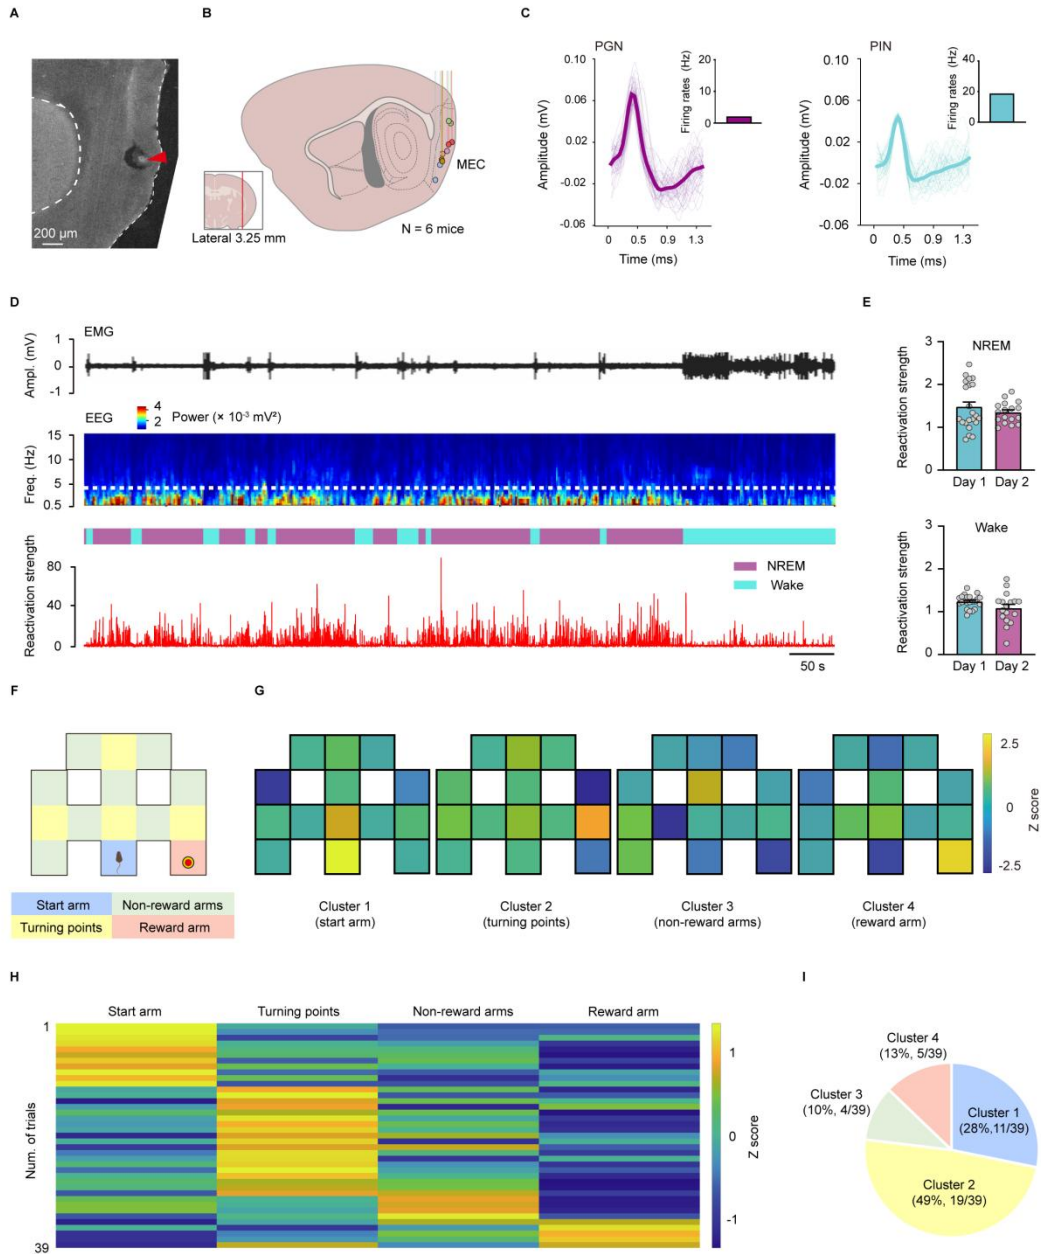

36

37 **Supplementary Figure 2. Firing patterns of MEC assemblies representing spatial**  
 38 **memory reactivate during post-training NREM sleep.**

39 **A** Representative images showing the electrode (red arrowhead) implanted in the  
 40 MEC.

41 **B** Recording sites were depicted as colored circles for all tested mice (n = 6 mice).

42 **C** Characteristic of the spike waveforms of a putative glutamatergic neuron (PGN, left)

43 or putative interneuron (PIN, right) in the MEC. Insets show the firing rate of an  
44 example PGN or PIN.

45 **D** Representative raw EMG traces, EEG power spectrum, color-coded hypnogram,  
46 and reactivation strength during post-training phase. Ampl., amplitude. Freq.,  
47 frequency.

48 **E** Comparison of reactivation strength during day 1 and day 2 post-training NREM  
49 sleep (top) and wakefulness (bottom). Data are presented as mean  $\pm$  s.e.m. (Welch's *t*-  
50 test, day 1: *n* = 22, day 2: *n* = 17, NREM:  $t_{37} = 1.002$ ,  $P = 0.324$ ; wake:  $t_{37} = 1.629$ ,  $P$   
51 = 0.118).

52 **F** Diagram showing the space of maze was divided into four sections: start arm (blue);  
53 non-reward arm (green); turning points (yellow); reward arm (bright pink). Red circle  
54 represents the food as a reward.

55 **G** Schematic showing the spatial distribution of four typical PC in the maze. The PC  
56 characterizes the firing pattern during training phase.

57 **H** Heatmap showing the spatial distribution of the PC in the maze.

58 **I** Pie chart showing the ratio of four types of space-related firing patterns.

59 Data are presented as mean  $\pm$  s.e.m. Source data are provided as a Source Data file.

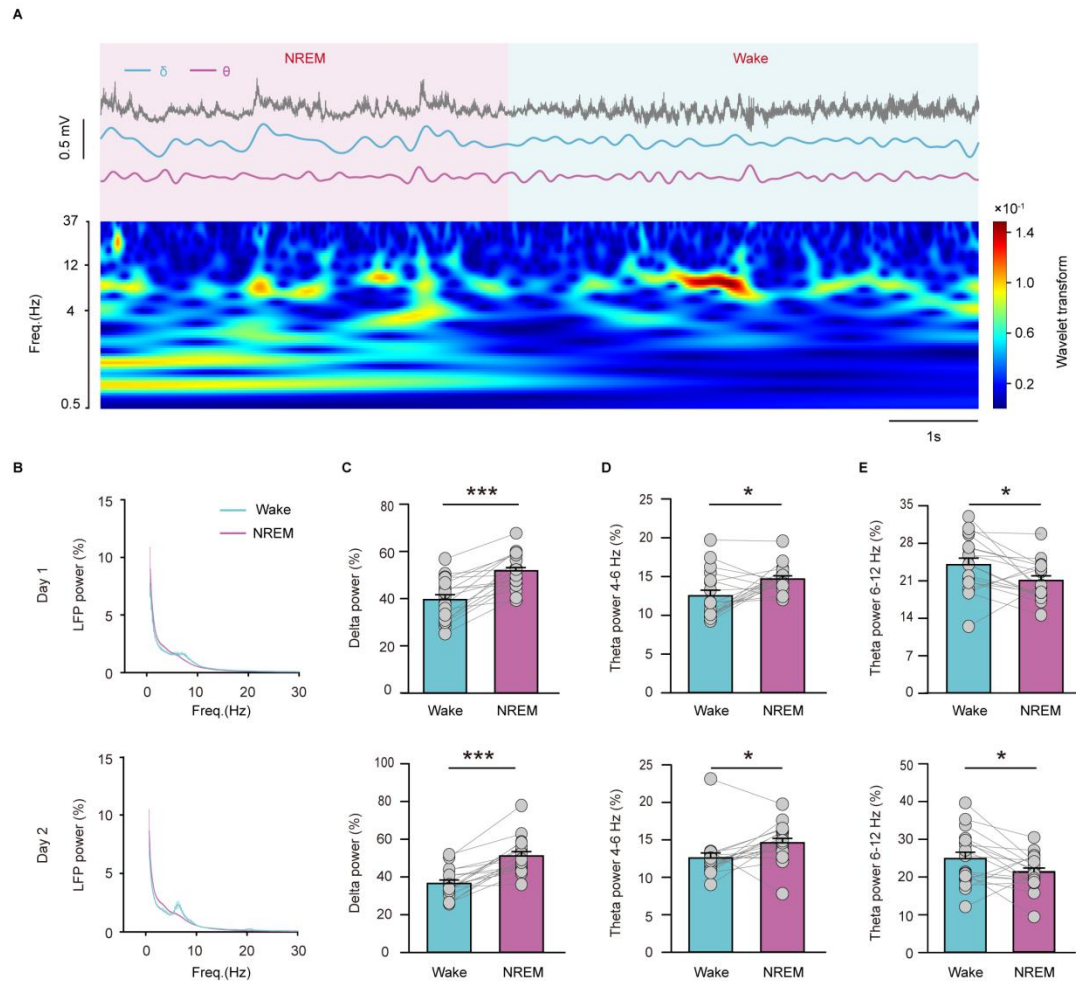

60

61 **Supplementary Figure 3. Characteristic of oscillatory activities of the MEC**

62 **during NREM sleep-wakefulness transitions.**

63 **A** Raw LFP (Gray: raw trace; cyan: filtered delta; magenta: filtered theta) and  
 64 corresponding power spectrum during post-training NREM sleep and wakefulness.

65 **B** Diagram showing normalized LFP power in different bands during day 1 and day 2  
 66 post-training NREM sleep and wakefulness.

67 **C, D, E** Changes in the delta power (**C**), 4-6 Hz theta power (**D**) and 6-12 Hz theta  
 68 power (**E**) in the MEC during post-training NREM sleep and wakefulness (Two tailed  
 69 paired *t* test, *n* = 18 channels, Day 1-delta:  $t_{17} = -6.356$ ,  $P = 7.18 \times 10^{-6}$ ; day 2-delta:  $t_{17}$   
 70  $= -7.068$ ,  $P = 1.89 \times 10^{-6}$ ; day 1-low theta:  $t_{17} = -2.749$ ,  $P = 0.0137$ ; day 2-low theta:

71  $t_{17} = -2.788, P = 0.0126$ ; day 1-high theta:  $t_{17} = 2.433, P = 0.0263$ ; day 2-high theta:  $t_{17}$   
 72  $= 2.203, P = 0.0417$ ).

73  $*P < 0.05, ***P < 0.001$ . Data are presented as mean  $\pm$  s.e.m. Source data are  
 74 provided as a Source Data file.

75

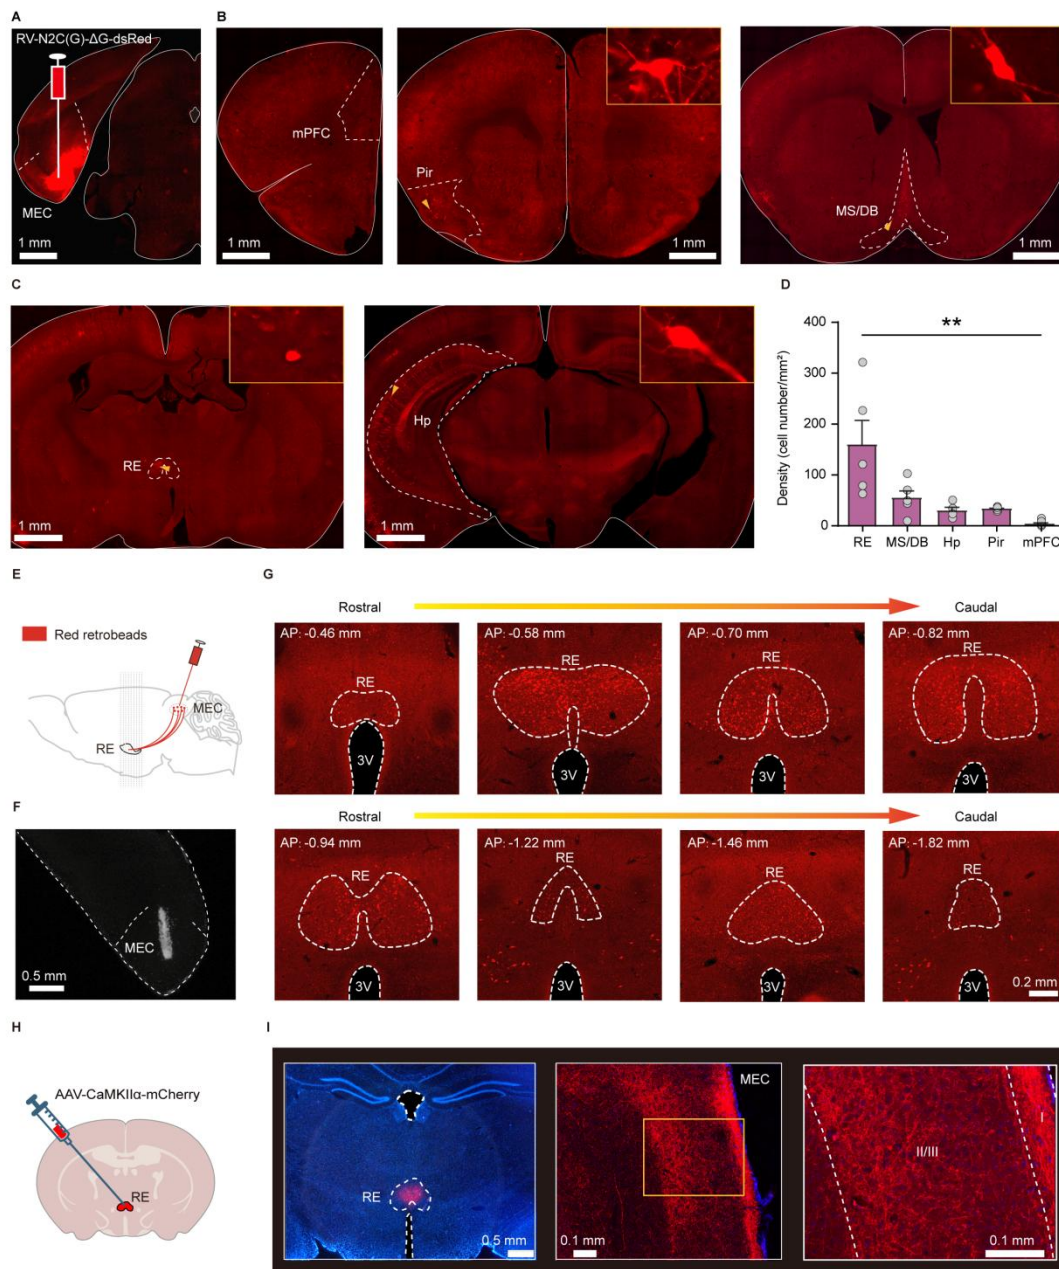

76

77 **Supplementary Figure 4. MEC receives monosynaptic projections from the RE.**

78 **A** An example coronal section showing the injection site of RV-N2C(G)- $\Delta$ G-dsRed.

79 **B** Representative coronal sections showing the expression of RV-dsRed in the medial  
80 prefrontal cortex (mPFC), piriform cortex (Pir) and medial septum/digonal band  
81 (MS/DB). Inset is the enlarged view of a dsRed-positive neuron expressed in the Pir  
82 and MS/DB.

83 **C** Same as **B** but for RE and hippocampus (Hp).

84 **D** Density of RV-labeled cells distributed in the brain regions identified as the  
85 upstream areas of MEC (Kruskal-Wallis One Way Analysis of Variance on Ranks,  $n =$   
86 5 mice for RE, MS/DB, Pir and mPFC,  $n = 4$  mice for Hp,  $H = 17.305$ ,  $P = 0.002$ . RE  
87 vs mPFC:  $H = 4.026$ ,  $P = 0.001$ ).

88 **E** Schematic of retrobeads-mediated retrograde tracing.

89 **F** Representative image showing the injection site of retrobeads in the MEC.

90 **G** Example coronal slices showing the retrobeads labeled neurons in the RE from  
91 rostral to caudal. AP: anterior-posterior axis. 3V: third ventricle.

92 **H** Schematic showing the mCherry-mediated anterograde tracing from the RE.

93 **I** Representative image showing the expression of AAV-CaMKII $\alpha$ -mCherry in the RE  
94 (left). Images showing the expression of mCherry-labeled RE axon terminals in the  
95 MEC (middle) and the enlarged view (right).

96  $n = 5$  mice were included in the experiment of RV-dsRed mediated retrograde tracing.  
97  $n = 4$  mice were included in the experiment of retrobeads mediated retrograde tracing.

98  $**P < 0.01$ . Data are presented as mean  $\pm$  s.e.m. Source data are provided as a Source  
99 Data file.

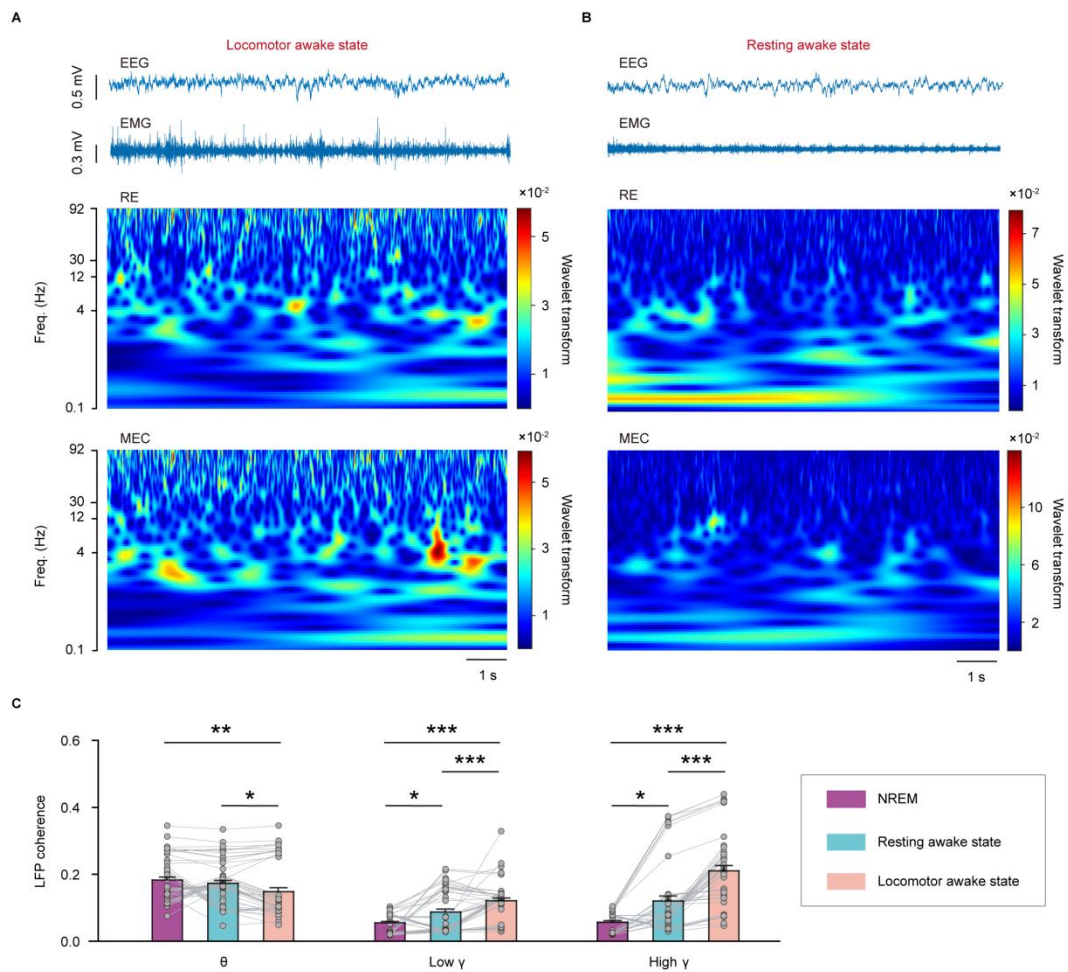

100

101 **Supplementary Figure 5. LFP coherence between RE and MEC during**  
 102 **locomotor awake state, resting awake state and NREM sleep.**

103 **A, B** Representative raw EEG-EMG traces, LFP in the RE and MEC during  
 104 locomotor awake state (**A**) and resting awake state (**B**).

105 **C** LFP coherence in the RE and MEC during NREM sleep, resting and locomotor  
 106 awake states (Friedman Repeated Measures ANOVA on Ranks followed by post hoc  
 107 Student-Newman-Keuls Method,  $n = 51$  channels, theta:  $q = 7.569$ ,  $P = 0.023$ ; low  
 108 gamma:  $q = 20.118$ ,  $P = 4.3 \times 10^{-5}$ ; high gamma:  $q = 60.118$ ,  $P = 8.82 \times 10^{-14}$ ).

109  $*P < 0.05$ ,  $**P < 0.01$ ,  $***P < 0.001$ . Data are presented as mean  $\pm$  s.e.m. Source data



110 are provided as a Source Data file.

111

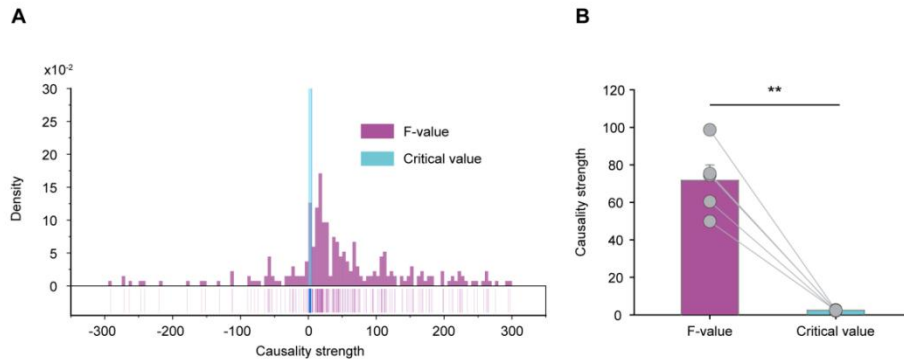

112

113 **Supplementary Figure 6. Isolated theta waves may propagate from RE to MEC**  
114 **proved by Granger analysis.**

115 **A** Distribution of the F-value and the critical value calculated by the Granger analysis  
116 for the detected theta events.

117 **B** Statistical analysis of the calculated F-value and the critical value (Two tailed  
118 paired  $t$  test,  $n = 5$  mice,  $t_4 = 8.488$ ,  $P = 0.00106$ ).

119 **\*\*** $P < 0.01$ . Data are presented as mean  $\pm$  s.e.m. Source data are provided as a Source  
120 Data file.

121

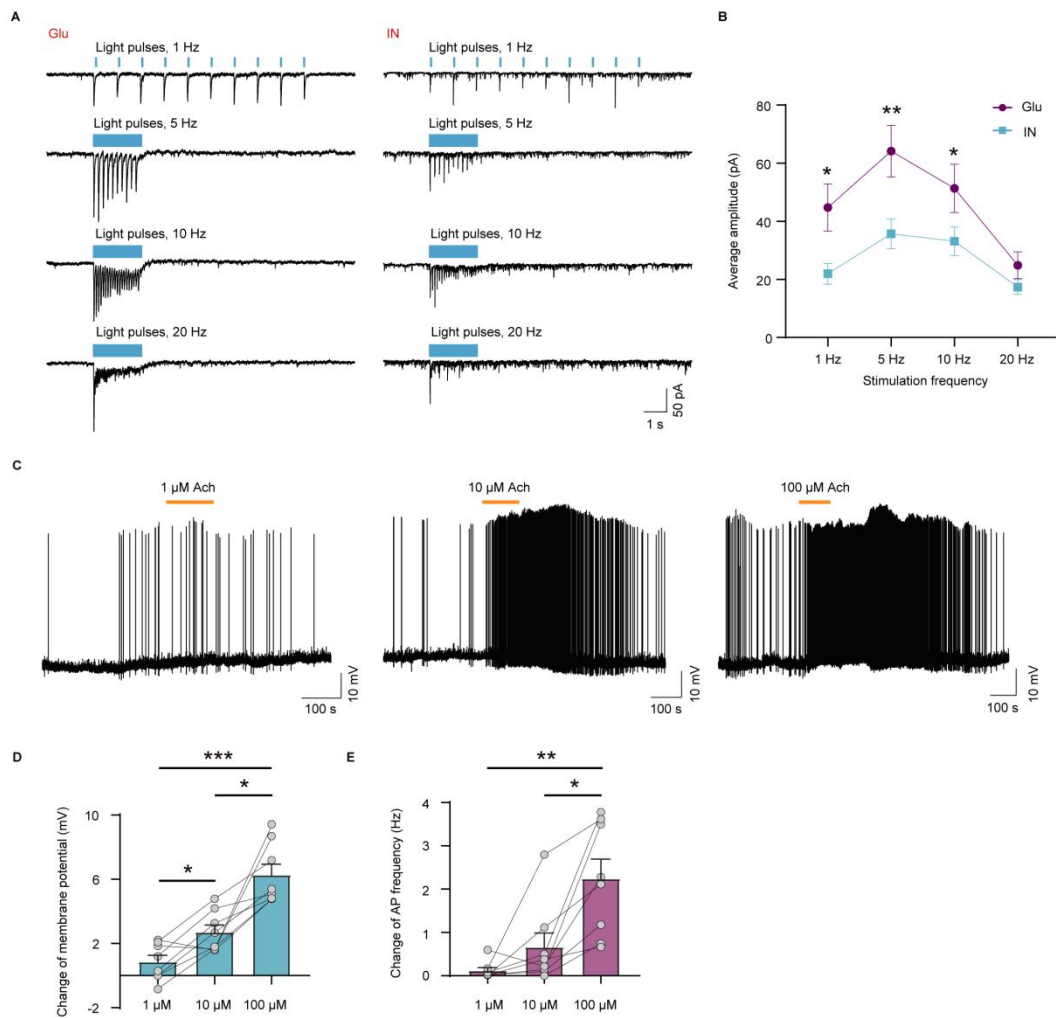

122

123 **Supplementary Figure 7. MEC interneurons are activated by wakefulness-**  
 124 **promoting neurotransmitter.**

125 **A** Sample voltage-clamp traces showing EPSCs of one example glutamatergic neuron  
 126 (Glu, left) or GABAergic interneuron (IN, right) evoked by a series of light pulses (1  
 127 Hz, 5 Hz, 10 Hz, 20 Hz).

128 **B** Average amplitude of EPSCs of MEC glutamatergic neurons (magenta) and  
 129 GABAergic interneurons (cyan) evoked by a series of light pulses (Scheirer-Ray-Hare  
 130 test followed by post hoc Holm-Sidak method, Glu:  $n = 13$  cells, IN:  $n = 13$  cells, Glu  
 131 vs. IN,  $H = 3.204$ ,  $P = 3.80 \times 10^{-5}$ ; light stimulation frequency factor,  $H = 5.681$ ,  $P =$

132  $3.00 \times 10^{-6}$ ; interaction,  $H = 0.0271$ ,  $P = 0.647$ ).

133 **C** Representative current-clamp traces of MEC<sup>RE-projecting</sup> GABAergic neurons at the  
134 baseline and in a bath solution containing 1  $\mu$ M, 10  $\mu$ M, 100  $\mu$ M acetylcholine (Ach).

135 **D, E** Change in membrane potential (**D**) and firing frequency (**E**) of MEC<sup>RE-projecting</sup>  
136 GABAergic neurons in a bath solution containing 1  $\mu$ M, 10  $\mu$ M, 100  $\mu$ M Ach  
137 compared with baseline (**D**: One-way Repeated Measures ANOVA followed by post  
138 hoc Holm-Sidak method,  $n = 8$  cells,  $F_{2,14} = 26.7$ ,  $P = 0.000017$ ; 1  $\mu$ M vs. 10  $\mu$ M:  $P =$   
139 0.0262; 1  $\mu$ M vs. 100  $\mu$ M:  $P = 0.000879$ ; 10  $\mu$ M vs. 100  $\mu$ M:  $P = 0.0145$ ; **E**: One-  
140 way Repeated Measures ANOVA followed by post hoc Holm-Sidak method,  $n = 8$   
141 cells,  $F_{2,14} = 14.9$ ,  $P = 0.000341$ ; 1  $\mu$ M vs. 10  $\mu$ M:  $P = 0.449$ ; 1  $\mu$ M vs. 100  $\mu$ M:  $P =$   
142 0.006453; 10  $\mu$ M vs. 100  $\mu$ M:  $P = 0.0209$ ).

143 \* $P < 0.05$ , \*\* $P < 0.01$ , \*\*\* $P < 0.001$ . Data are presented as mean  $\pm$  s.e.m. Source  
144 data are provided as a Source Data file.

145

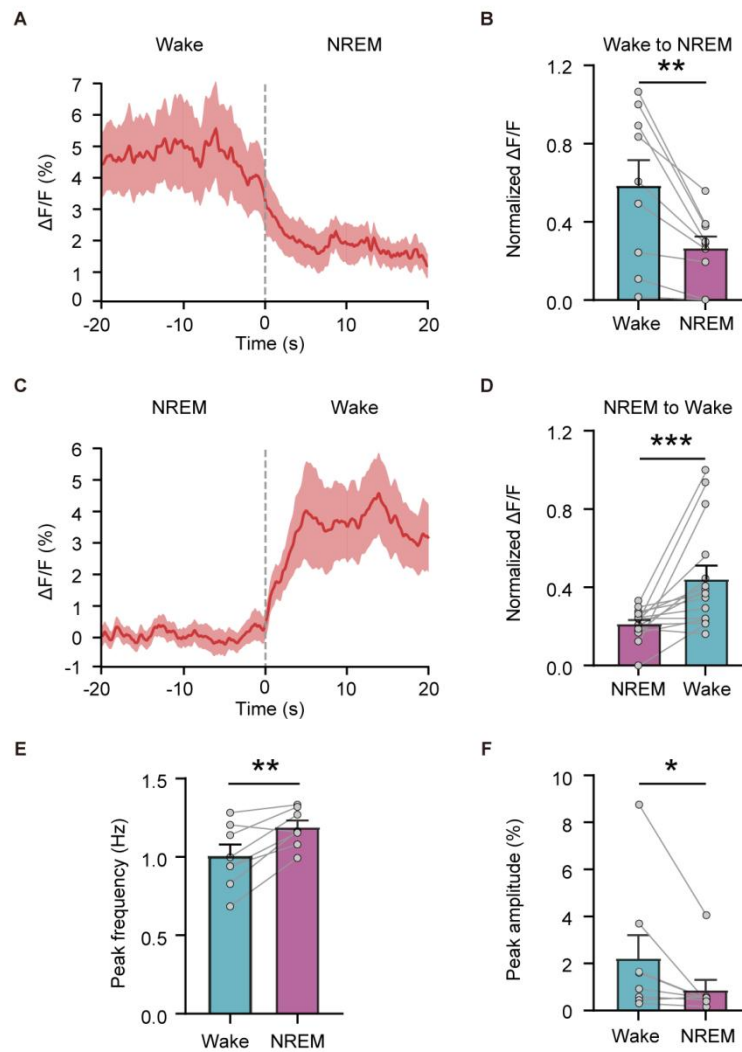

146

147 **Supplementary Figure 8. Changes in activities of the RE neurons projecting to**  
 148 **MEC across sleep-wakefulness cycle.**

149 **A, C**  $\text{Ca}^{2+}$  activity of RE neurons projecting to MEC during transitions from  
 150 wakefulness to NREM sleep (**A**), NREM sleep to wakefulness (**C**). Data are presented  
 151 as mean (red line)  $\pm$  s.e.m. (shaded area). Vertical dashed lines indicate the time points  
 152 of state transitions.

153 **B, D** Change in the  $\text{Ca}^{2+}$  activity before and after state transitions (Wake to NREM: n  
 154 = 9 trials from 8 mice, two tailed paired  $t$  test,  $t_8 = 3.789$ ,  $P = 0.00532$ ; NREM to

155 wake:  $n = 15$  trials from 8 mice, Wilcoxon Signed Rank Test,  $Z = -3.181$ ,  $P =$   
156 0.00147).

157 **E, F** Comparison of  $\text{Ca}^{2+}$  peak frequency (**E**) and amplitude (**F**) of RE neurons  
158 projecting to MEC during wakefulness and NREM sleep ( $n = 8$  mice, Peak frequency:  
159 two tailed paired  $t$  test,  $t_7 = -3.929$ ,  $P = 0.00568$ ; peak amplitude: Wilcoxon Signed  
160 Rank Test,  $Z = -2.100$ ,  $P = 0.039$ ).

161  $n = 8$  mice were included in the experiment of simultaneously recording RE  $\text{Ca}^{2+}$   
162 activity and MEC LFP (Fig. 4 and Supplementary Figure. 8).

163  $*P < 0.05$ ,  $**P < 0.01$ ,  $***P < 0.001$ . Data are presented as mean  $\pm$  s.e.m. Source  
164 data are provided as a Source Data file.

165

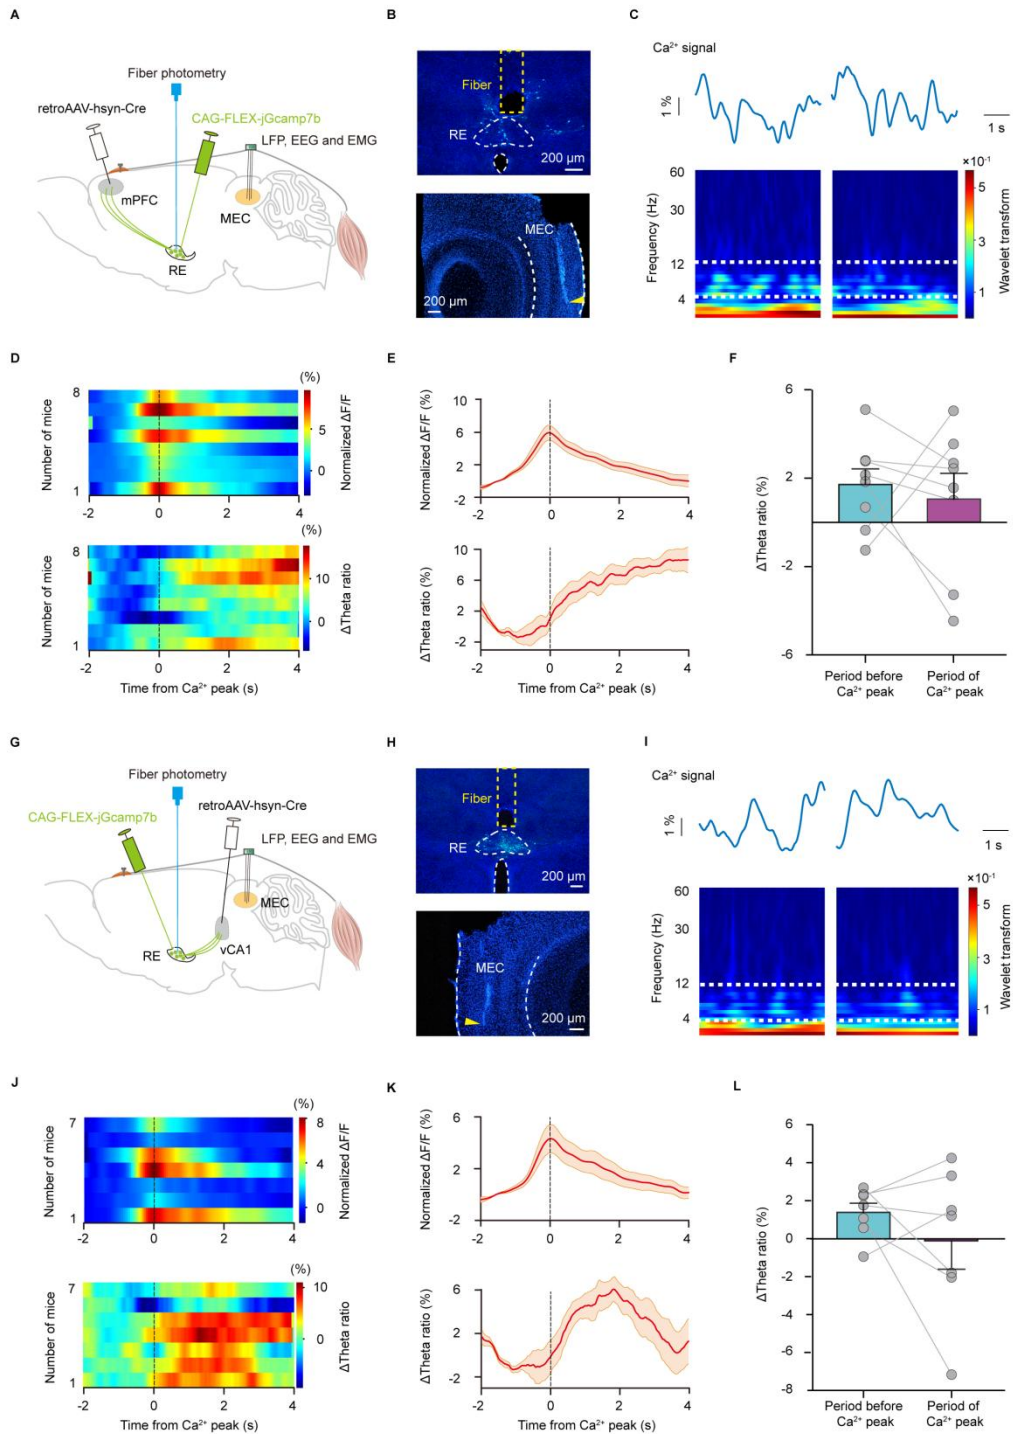

166

167 **Supplementary Figure 9. MEC theta waves is not positively correlated with the**  
 168 **activities of RE neurons projecting to mPFC or vCA1.**

169 **A, G** Diagram for simultaneously fiber photometry recording of RE neurons

170 projecting to mPFC (**A**) or vCA1 (**G**) as well as LFP recordings in the MEC.

171 **B, H** Representative image showing RE neurons projecting to mPFC (**B**) or vCA1 (**H**)  
172 expressing jGCaMp7b (green), the optical fiber (dotted yellow pane) implanted in the  
173 RE (top), and the electrode implanted in the MEC (bottom, yellow arrowhead).

174 **C, I** Synchronous recording of  $\text{Ca}^{2+}$  activity of RE neurons projecting to mPFC (**C**,  
175 top) or vCA1 (**I**, top) and LFP in the MEC (**C** or **I**, bottom) during NREM sleep.  
176 Between two dotted white lines is theta frequency band (4-12 Hz).

177 **D, J** Heatmaps illustrating the change of  $\text{Ca}^{2+}$  activity (top) and increment of  
178 theta/delta ratio ( $\Delta\text{Theta}$  ratio, bottom) around the peak of  $\text{Ca}^{2+}$  activity of RE neurons  
179 projecting to mPFC (**D**) or vCA1 (**J**) during NREM sleep ( $n = 8$  mice).

180 **E, K** Average  $\text{Ca}^{2+}$  activity and  $\Delta\text{Theta}$  ratio around the peak of  $\text{Ca}^{2+}$  activity of RE  
181 neurons projecting to mPFC (**E**) or vCA1 (**K**) from 8 mice. Data are presented as  
182 mean (orange line)  $\pm$  s.e.m. (shaded area). Vertical dashed lines indicate the time  
183 points of  $\text{Ca}^{2+}$  peak.

184 **F, L**  $\Delta\text{Theta}$  ratio before and during the period of  $\text{Ca}^{2+}$  peak of RE neurons projecting  
185 to mPFC (**F**) or vCA1 (**L**) (Two tailed paired  $t$  test, mPFC:  $n = 8$  mice,  $t_7 = 0.458$ ,  $P =$   
186  $0.661$ ; vCA1:  $n = 7$  mice,  $t_6 = 1.023$ ,  $P = 0.346$ ).

187 Data are presented as mean  $\pm$  s.e.m. Source data are provided as a Source Data file.

188

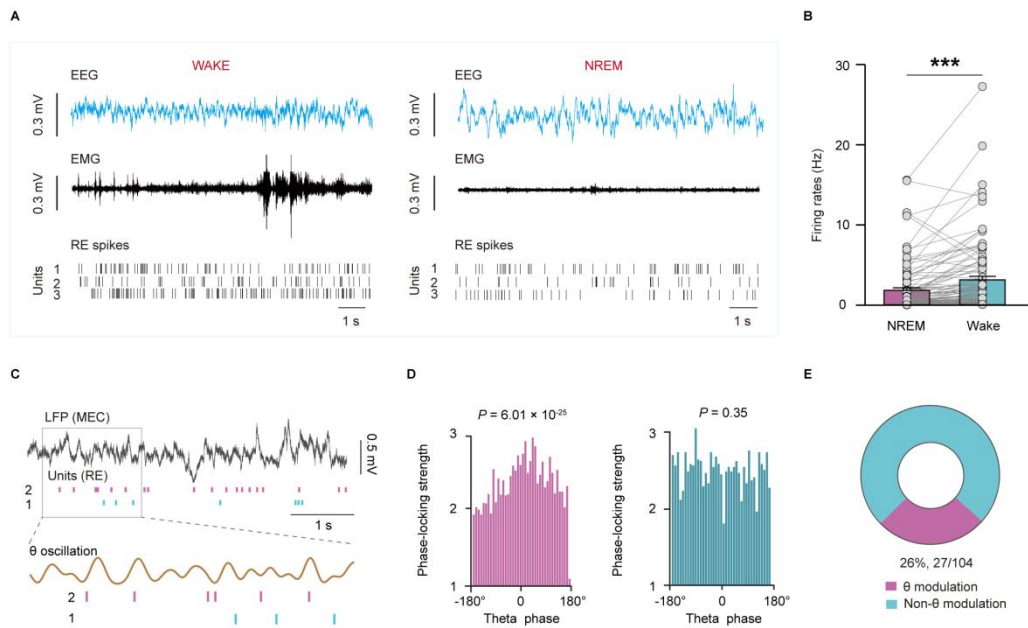

189

190 **Supplementary Figure 10. Spikes recorded in the RE are phase-locked to the**  
 191 **isolated theta waves in the MEC.**

192 **A** Representative raw EEG-EMG traces, RE spikes during wakefulness (left) and  
 193 NREM sleep (right).

194 **B** Comparison of RE firing rates during wakefulness and NREM sleep. Each dot  
 195 represents individual cell (Wilcoxon Signed Rank Test,  $n = 104$  cells,  $Z = -6.197$ ,  $P =$   
 196  $5.74 \times 10^{-10}$ ).

197 **C** Representative image showing synchronous recording of MEC LFP traces (top) and  
 198 spikes of two example cells in the RE (bottom). One cell (magenta) exhibited a  
 199 preference for firing during the up states of MEC theta waves, whereas another cell  
 200 (cyan) did not demonstrate any theta-phase locking.

201 **D** Phase-locking strength showing units of RE spiking entrained to MEC theta phase.

202 **E** Pie chart showing the percentage of the theta waves-modulated cells and non-theta



203 modulated cells.

204  $n = 5$  mice were included in Fig. 2 and Supplementary Figure. 10.

205 \*\*\* $P < 0.001$ . Data are presented as mean  $\pm$  s.e.m. Source data are provided as a

206 Source Data file.

207

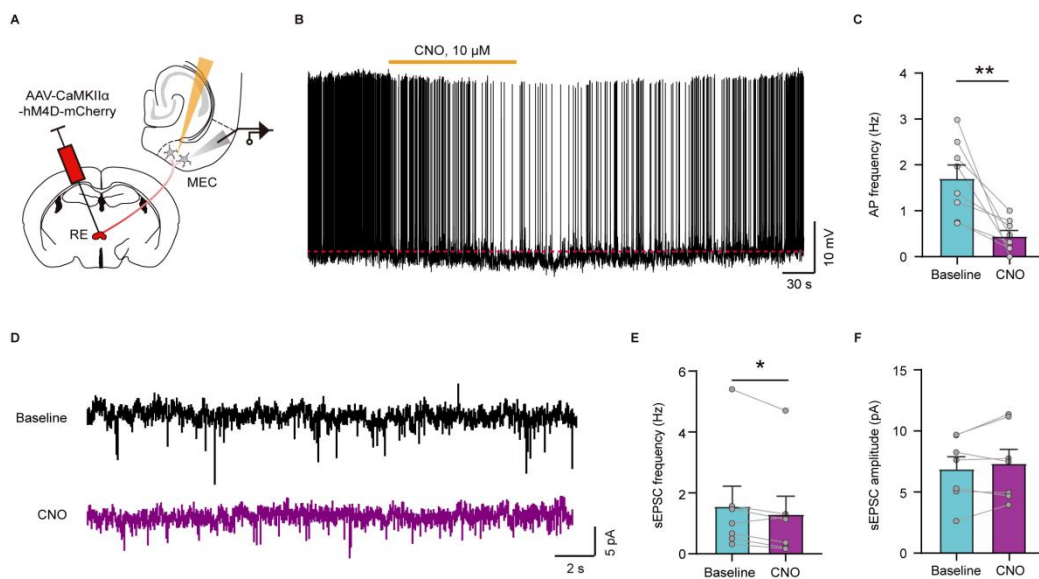

208

209 **Supplementary Figure 11. Activities of MEC excitatory neurons are down-**  
210 **regulated by chemogenetic inhibition of RE inputs.**

211 **A** Schematic for investigating the effect of CNO on the activities of MEC neurons.

212 **B** Sample traces showing activities of MEC<sup>RE-projecting</sup> neurons before, during and after  
213 bath application of CNO.

214 **C** Change of firing frequency of MEC<sup>RE-projecting</sup> neurons during bath application of  
215 CNO (Two tailed paired  $t$  test,  $n = 8$  cells,  $t_7 = 3.812$ ,  $P = 0.00661$ ).

216 **D** Representative traces of spontaneous excitatory postsynaptic currents (sEPSCs) of  
217 MEC<sup>RE-projecting</sup> neurons at the baseline and in a bath application of CNO.

218 **E, F** Change in the sEPSCs frequency (**E**) and amplitude (**F**) of MEC<sup>RE-projecting</sup>  
219 neurons after bath application of CNO (Two tailed paired *t* test, sEPSCs frequency: n  
220 = 7 cells,  $t_6 = 2.625$ ,  $P = 0.0393$ ; sEPSCs amplitude: n = 7 cells,  $t_6 = -1.133$ ,  $P =$   
221 0.300).

222 \* $P < 0.05$ , \*\* $P < 0.01$ . Data are presented as mean  $\pm$  s.e.m. Source data are provided  
223 as a Source Data file.

224

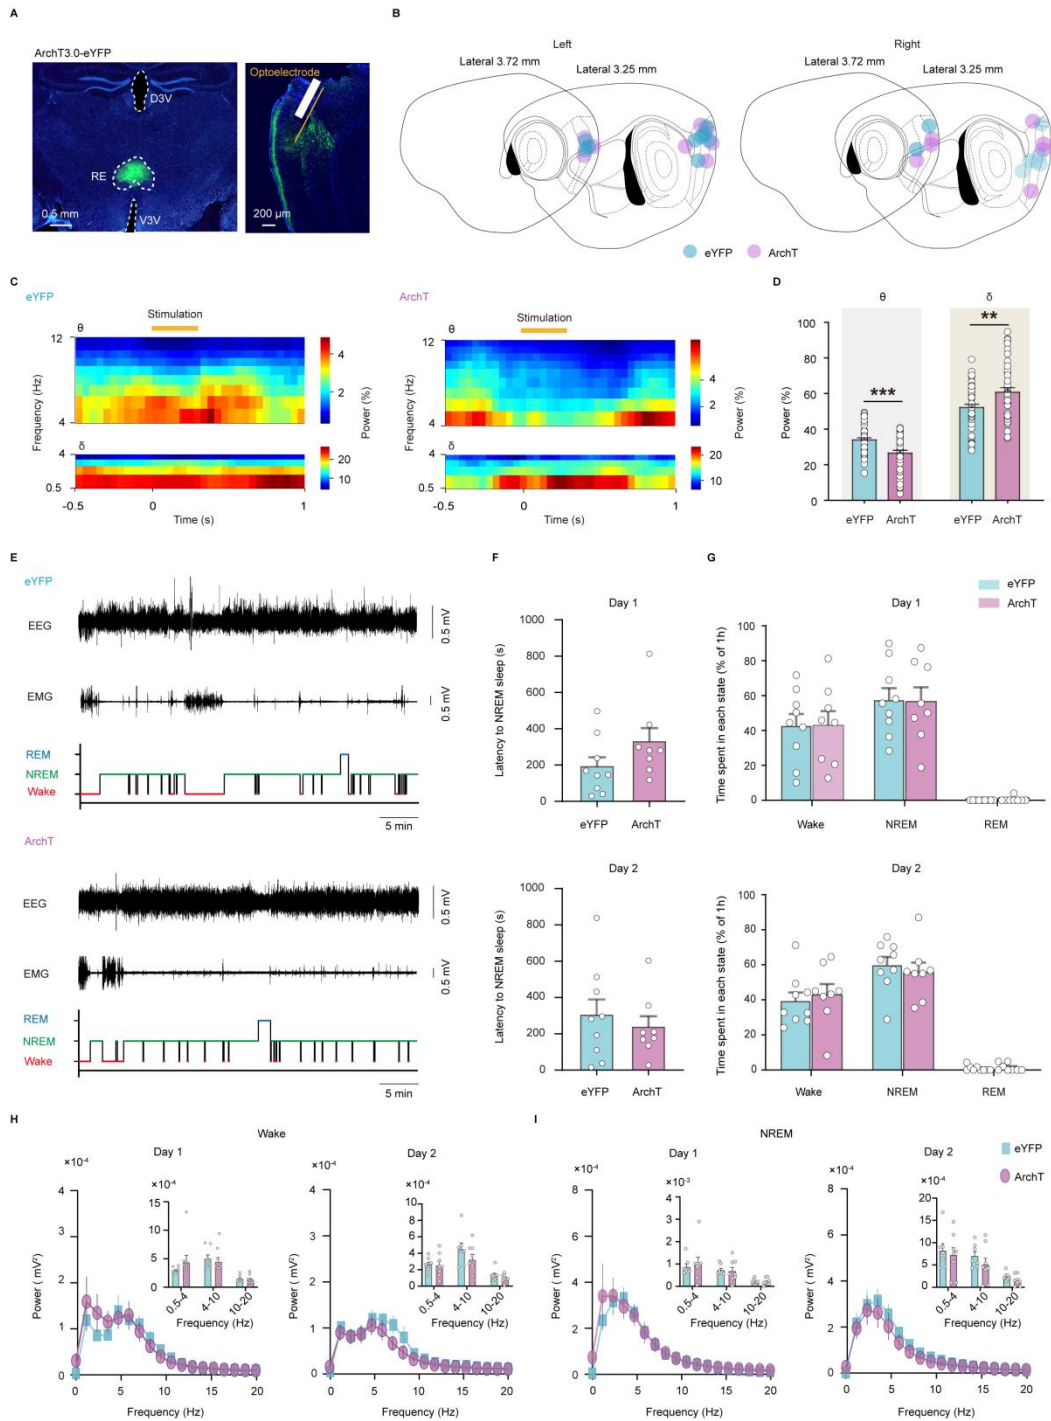

225

226 **Supplementary Figure 12. Closed-loop optogenetic inhibition of RE-MEC**

227 **pathway reduced theta power with sleep-wakefulness architecture unaffected.**

228 **A** Representative image showing the expression of AAV2/9-ArchT3.0-eYFP in the

229 RE (left), the optoelectrode in the MEC (right).

230 **B** Implanted optical fibers were depicted as filled cyan (eYFP, n = 9 mice) or magenta

231 (ArchT, n = 8 mice) circles for all the tested mice.

232 **C** Representative LFP power spectrum of theta and delta frequency around yellow  
233 light stimulation delivered during post-training NREM sleep in the eYFP and ArchT  
234 group.

235 **D** Optogenetic inhibition of RE-MEC pathway reduced theta power, while increased  
236 delta power during post-training NREM sleep (eYFP: n = 44 cells, ArchT: n = 42 cells,  
237 Two tailed unpaired *t* test, theta power:  $t_{84} = 3.741$ ,  $P = 0.000334$ ; delta power:  $t_{84} = -$   
238  $2.763$ ,  $P = 0.00703$ ).

239 **E** Representative raw EEG-EMG traces, and color-coded hypnogram from the mouse  
240 of the eYFP (top) or ArchT group (bottom).

241 **F** Latency to NREM sleep episodes after training during day 1 and day 2. (eYFP: n =  
242 9 mice, ArchT: n = 8 mice, Day 1: Mann-Whitney Rank Sum Test,  $U = 19$ ,  $P = 0.112$ ,  
243 day 2: two tailed unpaired *t* test,  $t_{15} = 0.607$ ,  $P = 0.553$ ).

244 **G** Time spent in each state after training during day 1 and day 2 (eYFP: n = 9 mice,  
245 ArchT: n = 8 mice, Two tailed unpaired *t* test or Mann-Whitney Rank Sum Test, Day  
246 1-wake:  $t_{15} = -0.0331$ ,  $P = 0.974$ , day 1-NREM:  $t_{15} = 0.0801$ ,  $P = 0.937$ ; day 1-REM:  
247  $U = 31.5$ ,  $P = 0.346$ , day 2-wake:  $t_{15} = -0.454$ ,  $P = 0.657$ ; day 2-NREM:  $t_{15} = 0.565$ ,  $P$   
248  $= 0.581$ ; day 2-REM:  $U = 31$ ,  $P = 0.612$ ).

249 **H** EEG power density of wakefulness in the eYFP and ArchT group during post-  
250 training one hour on day 1 and day 2. Inset is a quantitative analysis of the power in  
251 different frequency bands (eYFP: n = 7 mice, ArchT: n = 8 mice, Mann-Whitney  
252 Rank Sum Test or two tailed unpaired *t* test. Day 1: 0.5-4 Hz,  $U = 19$ ,  $P = 0.336$ ; 4-10

253 Hz,  $t_{13} = 0.442$ ,  $P = 0.666$ ; 10-20 Hz,  $t_{13} = 0.404$ ,  $P = 0.693$ . Day 2: 0.5-4 Hz,  $t_{13} =$   
254 0.139,  $P = 0.892$ ; 4-10 Hz,  $t_{13} = 1.233$ ,  $P = 0.239$ ; 10-20 Hz,  $t_{13} = 1.307$ ,  $P = 0.214$ ).

255 **I** Same as **H** but for NREM sleep (Mann-Whitney Rank Sum Test or two tailed  
256 unpaired  $t$  test. Day 1: 0.5-4 Hz,  $U = 24$ ,  $P = 0.694$ ; 4-10 Hz,  $t_{13} = 0.201$ ,  $P = 0.844$ ;  
257 10-20 Hz,  $t_{13} = 0.548$ ,  $P = 0.593$ . Day 2: 0.5-4 Hz,  $t_{13} = 0.428$ ,  $P = 0.675$ ; 4-10 Hz:  $t_{13}$   
258 = 1.073,  $P = 0.303$ ; 10-20 Hz:  $t_{13} = 1.600$ ,  $P = 0.134$ ).

259  $n = 9$  mice and 8 mice were included in the eYFP or ArchT group for Fig. 6 and  
260 Supplementary Figure. 12.

261 **\*\*** $P < 0.01$ , **\*\*\*** $P < 0.001$ . Data are presented as mean  $\pm$  s.e.m. Source data are  
262 provided as a Source Data file.

263

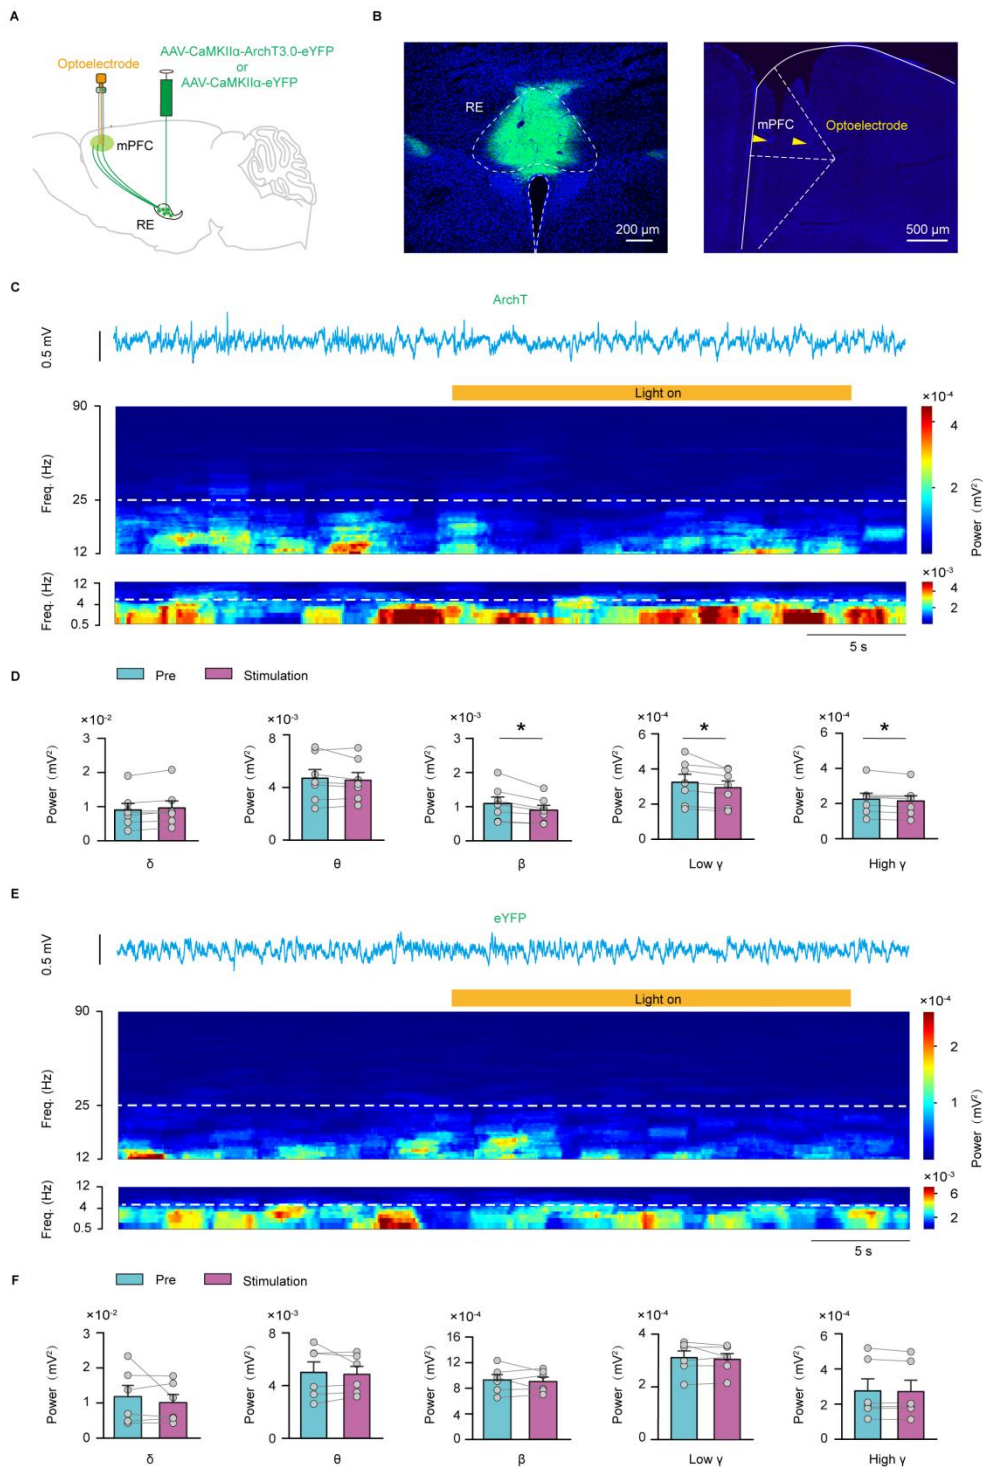

264

265 **Supplementary Figure 13. Effects of optogenetic inhibition of RE-mPFC**

266 **pathway on mPFC network oscillations during NREM sleep.**

267 **A Schematic of optogenetic inhibition of the RE-mPFC pathway.**

268 **B** Representative image showing the expression of ArchT-eYFP in the RE (left) and  
269 the optoelectrode implanted in the mPFC (yellow arrow, right).

270 **C, E** Raw trace of LFP (top) recorded in the mPFC and corresponding power  
271 spectrum (bottom) before and during yellow light stimulation during NREM sleep in  
272 ArchT (**C**) or eYFP (**E**) group.

273 **D, F** Changes in the mPFC LFP after inhibition RE-mPFC pathway during NREM  
274 sleep of the ArchT (**D**) or eYFP (**F**) group (ArchT group:  $n = 7$  mice, two tailed paired  
275  $t$  test or Wilcoxon Signed Rank Test. Delta:  $t_6 = -2.026$ ,  $P = 0.0891$ ; theta:  $t_6 = 1.026$ ,  
276  $P = 0.345$ ; beta:  $t_6 = 3.496$ ,  $P = 0.0129$ ; low gamma:  $Z = -2.366$ ,  $P = 0.016$ ; high  
277 gamma:  $t_6 = 3.475$ ,  $P = 0.0132$ , eYFP group:  $n = 6$  mice, two tailed paired  $t$  test or  
278 Wilcoxon Signed Rank Test. Delta:  $Z = -0.314$ ,  $P = 0.844$ ; theta:  $Z = 0.105$ ,  $P = 1.000$ ;  
279 beta:  $t_5 = 0.485$ ,  $P = 0.648$ ; low gamma:  $t_5 = 0.731$ ,  $P = 0.498$ ; high gamma:  $t_5 = 0.954$ ,  
280  $P = 0.384$ ).

281  $*P < 0.05$ . Data are presented as mean  $\pm$  s.e.m. Source data are provided as a Source  
282 Data file.  
283

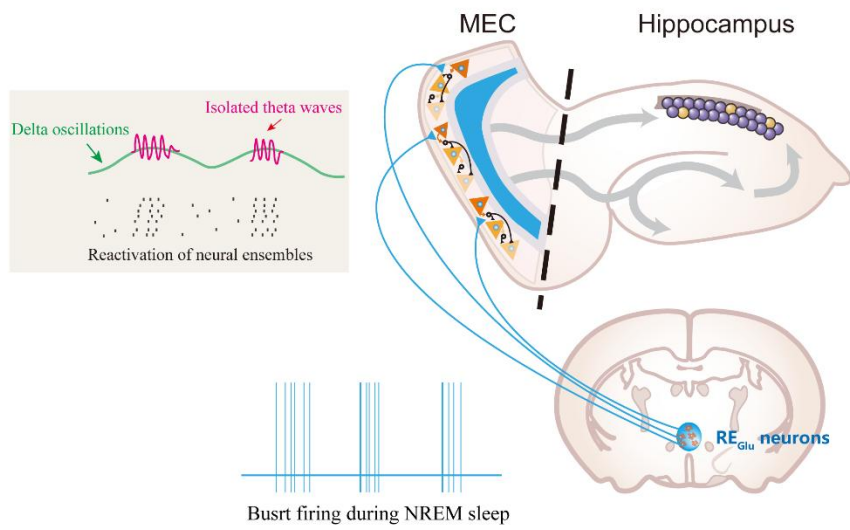

284

285 **Supplementary Figure 14. A summary schematic illustrates that the midline**  
 286 **thalamus drives the isolated theta waves in the MEC, which are essential for**  
 287 **memory reactivation during NREM sleep.**

288
